# Supplementary material for: Structural diversity of a series of coordination polymers built from 5-substituted isophthalic acid with or without a methyl-functionalized N-donor ligand
Source: Royal Society of Chemistry journal article supplement (doi:10.1039/c5ce02314a), 2016-01-01
Supplement: c5ce02314a1.pdf [file c5ce02314a1.pdf]

## Supporting Information

### **Structural Diversity of a series of coordination polymers built from 5-substituted isophthalic acid with or without methyl-functionalized N-donor ligand**

*De-Yun Ma,<sup>1,†</sup> Liang Qin,<sup>1,†</sup> Jia-Mei Lei,<sup>†,‡</sup> Yun-Qiu Liang,<sup>†</sup> Wei-Jie Lin,<sup>†</sup> Jing-Jing  
Yan,<sup>†</sup> Wan-Qiu Ding,<sup>†</sup> Hai-Fu Guo,<sup>\*,†</sup> and Yun Ling<sup>\*,§</sup>*

*<sup>†</sup>School of Chemistry and Chemical Engineering, Zhaoqing University, Zhaoqing  
526061, P. R. China. Fax: +86-758-2752-796; Tel: +86-758-2752-796; E-mail:  
[guohaifu@zqu.edu.cn](mailto:guohaifu@zqu.edu.cn)*

*<sup>‡</sup> Chemical Engineering College of Inner Mongolia University of Technology, Hohhot  
010051, China.*

*<sup>§</sup> Department of Chemistry, Fudan University, Shanghai, 200433, P. R. China. E-mail:  
[yunling@fudan.edu.cn](mailto:yunling@fudan.edu.cn)*

<sup>1</sup> These authors contributed equally to this work.

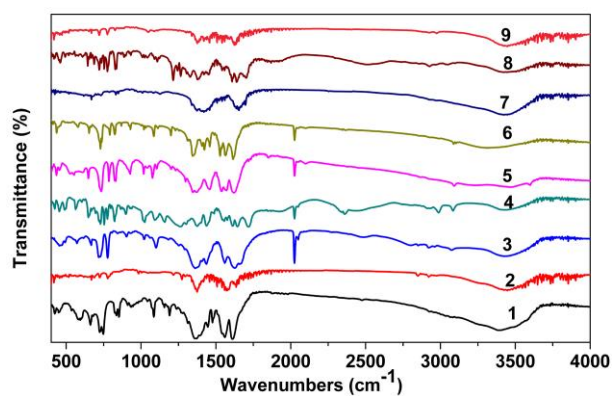

**Figure S1.** IR spectra of 1-9.

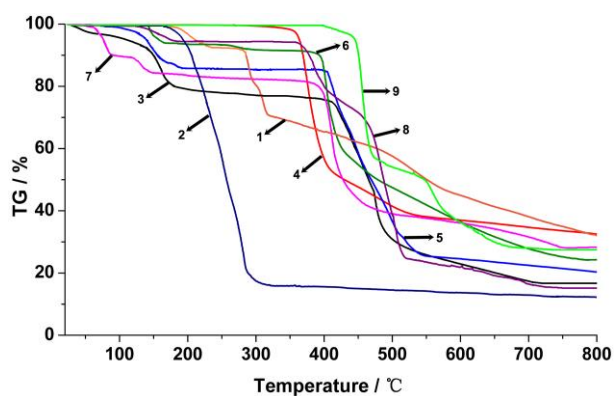

**Figure S2.** Themogravimetric curves for CPs 1-9.

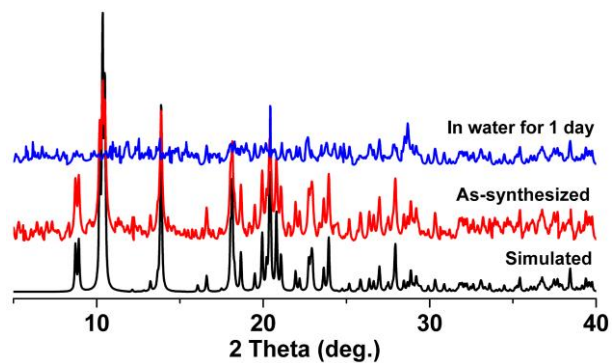

**Figure S3.** PXRD patterns of 1.

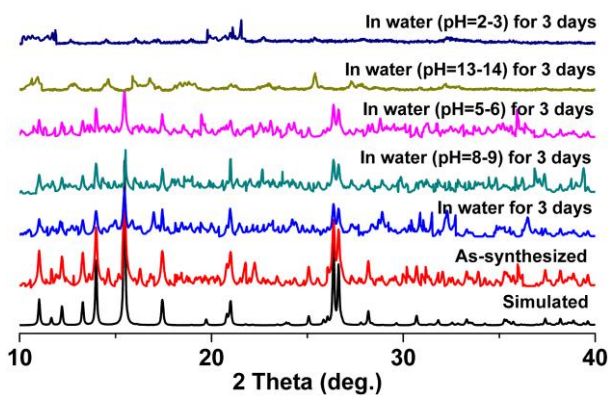

**Figure S4.** PXRD patterns of 2.

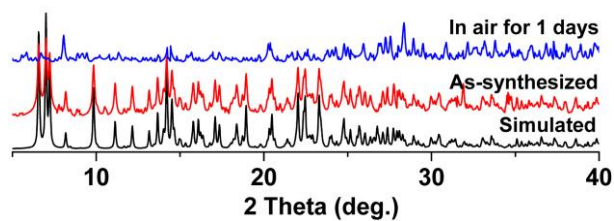

Figure S5. PXRD patterns of 3.

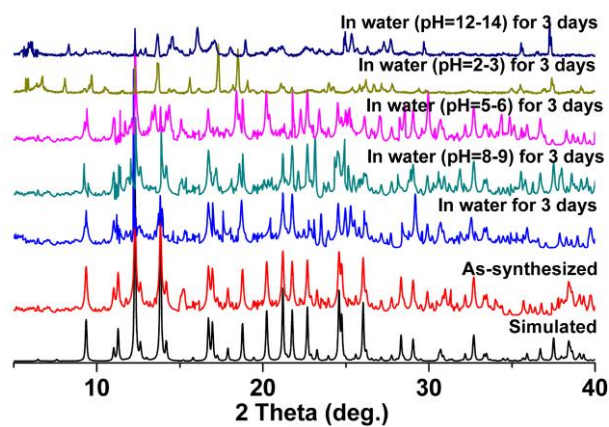

Figure S6. PXRD patterns of 4.

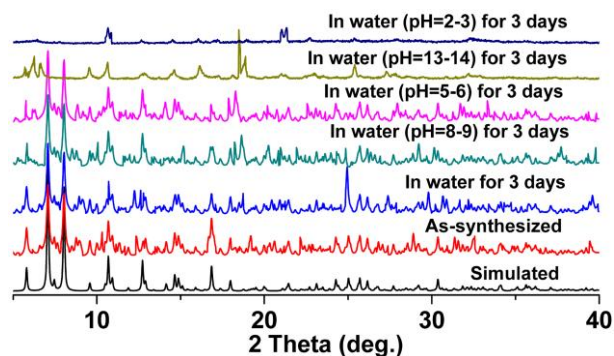

Figure S7. PXRD patterns of 5.

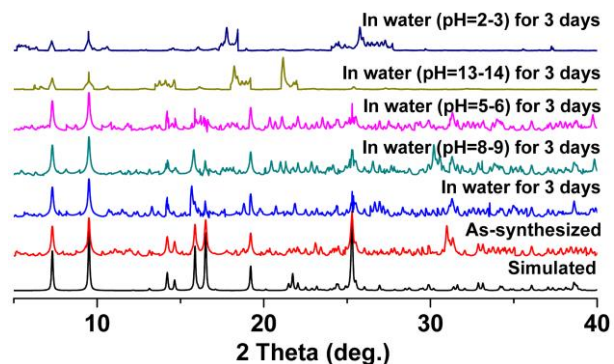

Figure S8. PXRD patterns of 6.

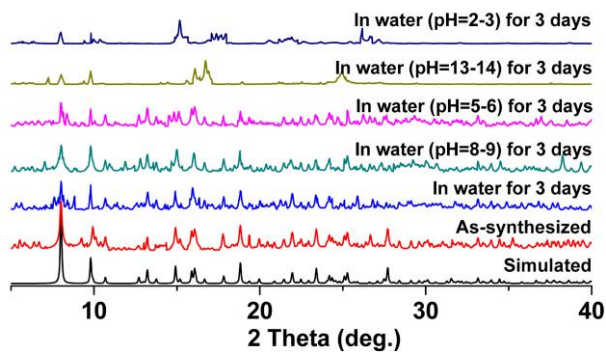

Figure S9. PXRD patterns of 7.

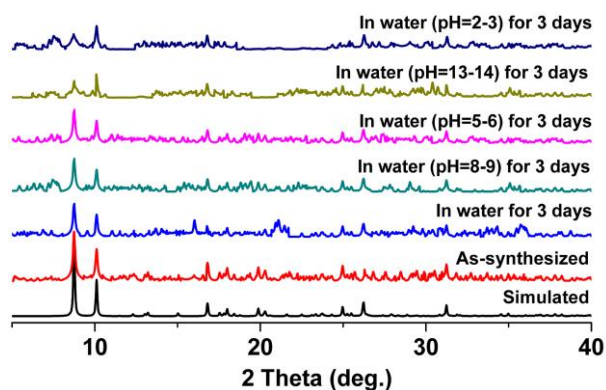

Figure S10. PXRD patterns of 8.

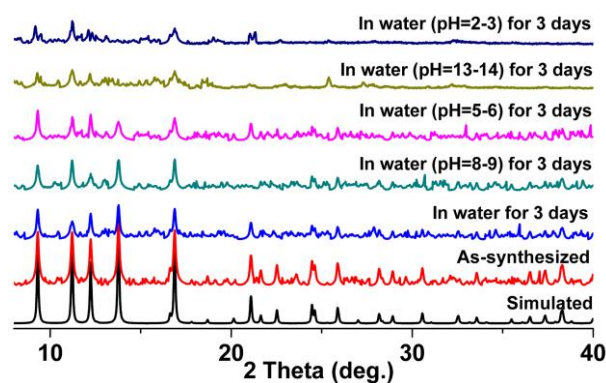

Figure S11. PXRD patterns of 9.

Table S1 Selected bond length and angles of CPs 1-9

| 1                                     |          |                           |          |
|---------------------------------------|----------|---------------------------|----------|
| Zn1-O1                                | 2.141(9) | Zn1-O2                    | 2.293(7) |
| Zn1-O3                                | 2.068(8) | Zn1-O4 <sup>i</sup>       | 2.109(7) |
| Zn1-O5                                | 2.278(8) | Zn2-O6                    | 2.083(7) |
| Zn2-O7 <sup>ii</sup>                  | 2.045(8) | Zn2-O9                    | 2.060(8) |
| O4 <sup>i</sup> -Zn1-O8 <sup>ii</sup> | 105.5(3) | O4 <sup>i</sup> -Zn1-O1   | 92.6(3)  |
| O8 <sup>ii</sup> -Zn1-O5              | 148.0(3) | O4 <sup>i</sup> -Zn1-O2   | 150.5(3) |
| O4 <sup>i</sup> -Zn1-O6               | 103.3(3) | O7 <sup>ii</sup> -Zn2-O9  | 91.7(3)  |
| O9-Zn2-O3 <sup>i</sup>                | 168.3(3) | O7 <sup>ii</sup> -Zn2-O11 | 179.3(3) |

|                                          |            |                                            |            |
|------------------------------------------|------------|--------------------------------------------|------------|
| O7 <sup>ii</sup> -Zn2-O6                 | 88.8(3)    | O3 <sup>i</sup> -Zn2-O10                   | 84.6(3)    |
|                                          |            | <b>2</b>                                   |            |
| Zn1-O1                                   | 1.9727(17) | Zn1-N1                                     | 2.097(2)   |
| O1 <sup>i</sup> -Zn1-O1                  | 127.96(11) | O1 <sup>i</sup> -Zn1-N1                    | 100.62(8)  |
| O1 <sup>i</sup> -Zn1-N1 <sup>i</sup>     | 108.75(7)  |                                            |            |
|                                          |            | <b>3</b>                                   |            |
| Zn1-O1                                   | 2.112(4)   | Zn1-O4 <sup>i</sup>                        | 2.098(4)   |
| Zn1-O5                                   | 2.064(4)   | Zn1-O11 <sup>ii</sup>                      | 2.049(5)   |
| Zn2-O3 <sup>i</sup>                      | 2.006(4)   | Zn2-O6                                     | 1.977(4)   |
| Zn2-O9                                   | 1.960(4)   | Zn2-O13                                    | 1.989(4)   |
| Zn3-O2                                   | 1.961(4)   | Zn3-O7 <sup>ii</sup>                       | 1.951(4)   |
| Zn3-O12 <sup>ii</sup>                    | 1.963(5)   | Zn3-O16                                    | 1.942(4)   |
| O11 <sup>ii</sup> -Zn1-O5                | 88.46(17)  | O11 <sup>ii</sup> -Zn1-O15 <sup>iii</sup>  | 96.07(18)  |
| O5-Zn1-O15 <sup>iii</sup>                | 91.05(18)  | O11 <sup>ii</sup> -Zn1-O4 <sup>i</sup>     | 175.61(17) |
| O4 <sup>i</sup> -Zn1-O14                 | 87.88(17)  | O15 <sup>iii</sup> -Zn1-O1                 | 91.84(17)  |
| O9-Zn2-O6                                | 91.06(17)  | O9-Zn2-O13                                 | 111.00(19) |
| O9-Zn2-O3 <sup>i</sup>                   | 107.78(18) | O13-Zn2-O3 <sup>i</sup>                    | 111.75(18) |
| O16 <sup>iii</sup> -Zn3-O7 <sup>ii</sup> | 110.43(18) | O16 <sup>iii</sup> -Zn3-O2                 | 122.18(18) |
| O7 <sup>ii</sup> -Zn3-O2                 | 107.50(17) | O16 <sup>iii</sup> -Zn3-O12 <sup>iii</sup> | 106.87(19) |
|                                          |            | <b>4</b>                                   |            |
| Zn1-O13                                  | 1.964(13)  | Zn1-O10                                    | 2.044(15)  |
| Zn1-N1                                   | 2.055(9)   | Zn1-O5                                     | 2.062(14)  |
| Zn2-O9                                   | 1.977(14)  | Zn2-N2 <sup>i</sup>                        | 1.998(9)   |
| Zn2-O1                                   | 2.000(13)  | Zn2-O14                                    | 2.057(12)  |
| Zn3-O8 <sup>iv</sup>                     | 1.967(15)  | Zn3-O3 <sup>ii</sup>                       | 2.009(14)  |
| Zn3-N3                                   | 2.022(5)   | Zn3-O7                                     | 2.054(13)  |
| Zn4-O12 <sup>v</sup>                     | 1.982(14)  | Zn4-N4                                     | 2.029(5)   |
| Zn4-O11                                  | 2.086(13)  | Zn4-O15 <sup>vi</sup>                      | 2.091(12)  |
| O13-Zn1-O10                              | 91.3(6)    | O13-Zn1-N1                                 | 101.3(5)   |
| O10-Zn1-O5                               | 87.6(6)    | O2-Zn1-N1                                  | 103.2(5)   |
| O9-Zn2-N2 <sup>i</sup>                   | 95.9(6)    | O9-Zn2-O1                                  | 162.0(6)   |
| O9-Zn2-O14                               | 88.3(6)    | O9-Zn2-O6                                  | 102.7(5)   |
| O8 <sup>iv</sup> -Zn3-O3 <sup>ii</sup>   | 89.4(6)    | O8 <sup>iv</sup> -Zn3-O4 <sup>iii</sup>    | 161.7(6)   |
| O3 <sup>ii</sup> -Zn3-N3                 | 109.4(5)   | O4 <sup>iii</sup> -Zn3-O7                  | 89.4(6)    |
| O12 <sup>v</sup> -Zn4-O16 <sup>vii</sup> | 164.2(5)   | O12 <sup>v</sup> -Zn4-N <sup>4</sup>       | 97.0(4)    |
| O16 <sup>vii</sup> -Zn4-O11              | 88.5(6)    | N4-Zn4-O15 <sup>vi</sup>                   | 100.3(4)   |
|                                          |            | <b>5</b>                                   |            |
| Zn1-O1                                   | 2.033(4)   | Zn1-O14 <sup>i</sup>                       | 1.999(5)   |
| Zn1-O24 <sup>ii</sup>                    | 1.938(4)   | Zn2-O2                                     | 2.199(4)   |
| Zn2-O7                                   | 2.135(5)   | Zn2-O23 <sup>ii</sup>                      | 2.116(4)   |
| Zn3-O8                                   | 1.994(4)   | Zn3-O13                                    | 1.968(4)   |
| Zn3-O26                                  | 1.820(5)   | Zn4-O17 <sup>iii</sup>                     | 2.348(4)   |
| Zn4-O19                                  | 1.998(5)   | Zn4-O27                                    | 1.874(4)   |
| Zn5-O18 <sup>iii</sup>                   | 1.967(4)   | Zn5-O20                                    | 1.981(5)   |

|                                          |            |                                           |            |
|------------------------------------------|------------|-------------------------------------------|------------|
| Zn6-O10 <sup>v</sup>                     | 2.147(4)   | Zn6-O28 <sup>vii</sup>                    | 2.094(5)   |
| Zn7-O5 <sup>viii</sup>                   | 1.843(4)   | Zn7-O9 <sup>vi</sup>                      | 1.903(4)   |
| O25-Zn1-O24 <sup>ii</sup>                | 112.7(2)   | O24 <sup>ii</sup> -Zn1-O14 <sup>i</sup>   | 115.6(2)   |
| O14 <sup>i</sup> -Zn1-O1                 | 95.86(18)  | O26-Zn2-O25                               | 172.72(16) |
| O26-Zn2-O23 <sup>ii</sup>                | 89.43(18)  | O25-Zn2-O25 <sup>i</sup>                  | 80.2(2)    |
| O26-Zn3-O13                              | 123.8(2)   | O13-Zn3-O27                               | 105.30(18) |
| O27-Zn4-O17 <sup>iii</sup>               | 85.86(16)  | O19-Zn4-O28                               | 93.95(17)  |
| O18 <sup>iii</sup> -Zn5-O20              | 101.07(17) | O18 <sup>iii</sup> -Zn5-O6 <sup>iv</sup>  | 94.26(17)  |
| O20-Zn5-O1W                              | 143.78(19) | O28 <sup>vii</sup> -Zn6-O10 <sup>vi</sup> | 86.62(19)  |
| O28 <sup>vii</sup> -Zn6-O10 <sup>v</sup> | 93.38(19)  | O10 <sup>vi</sup> -Zn6-O10 <sup>v</sup>   | 180.0      |
| O5 <sup>viii</sup> -Zn7-O9 <sup>vi</sup> | 119.55(17) | O5 <sup>viii</sup> -Zn7-O2W               | 102.58(17) |
| <b>6</b>                                 |            |                                           |            |
| Zn1-O3 <sup>ii</sup>                     | 1.9652(11) | Zn1-O2 <sup>i</sup>                       | 1.9988(11) |
| Zn1-N2                                   | 2.0638(12) | Zn1-O1W                                   | 2.0997(12) |
| O3 <sup>ii</sup> -Zn1-O2 <sup>i</sup>    | 124.46(5)  | O3 <sup>ii</sup> -Zn1-N2                  | 121.01(5)  |
| O2 <sup>i</sup> -Zn1-N2                  | 113.63(5)  | O3 <sup>ii</sup> -Zn1-O1W                 | 92.27(5)   |
| O2 <sup>i</sup> -Zn1-O1W                 | 99.42(5)   | N2-Zn1-O1W                                | 87.60(5)   |
| O3 <sup>ii</sup> -Zn1-O1                 | 86.82(5)   | O2 <sup>i</sup> -Zn1-O1                   | 83.03(4)   |
| <b>7</b>                                 |            |                                           |            |
| Cd1-O1                                   | 2.234(2)   | Cd1-O1W                                   | 2.299(2)   |
| Cd1-O3 <sup>i</sup>                      | 2.307(2)   | Cd1-N1                                    | 2.309(2)   |
| Cd1-O4 <sup>ii</sup>                     | 2.375(2)   | Cd1-O4 <sup>i</sup>                       | 2.646(2)   |
| O1-Cd1-O1W                               | 87.84(9)   | O1-Cd1-O3 <sup>i</sup>                    | 125.01(8)  |
| O1W-Cd1-O3 <sup>i</sup>                  | 82.13(9)   | O1-Cd1-N1                                 | 135.41(8)  |
| O1W-Cd1-N1                               | 90.60(9)   | O3 <sup>i</sup> -Cd1-N1                   | 98.79(8)   |
| O1-Cd1-O4 <sup>ii</sup>                  | 86.71(8)   | O1-Cd1-O4 <sup>i</sup>                    | 79.46(7)   |
| <b>8</b>                                 |            |                                           |            |
| Zn1-N1                                   | 2.356(6)   | Zn1-O1 <sup>ii</sup>                      | 2.324(5)   |
| Zn1-O2                                   | 2.378(5)   | Zn1-O3 <sup>i</sup>                       | 2.309(6)   |
| Zn1-O1W                                  | 2.351(6)   | O3 <sup>i</sup> -Zn1-O1 <sup>ii</sup>     | 126.6(2)   |
| O3 <sup>i</sup> -Zn1-O1W                 | 81.0(2)    | O1 <sup>ii</sup> -Zn1-O1W                 | 82.9(2)    |
| O3 <sup>i</sup> -Zn1-N1                  | 104.4(2)   | O1W-Zn1-N1                                | 88.3(2)    |
| O1 <sup>ii</sup> -Zn1-N1                 | 125.6(2)   | O1 <sup>ii</sup> -Zn1-O2                  | 106.43(19) |
| <b>9</b>                                 |            |                                           |            |
| Zn1-N1                                   | 2.057(4)   | Zn1-O1                                    | 2.082(3)   |
| Zn1-O2 <sup>ii</sup>                     | 2.009(2)   | Zn1-O2 <sup>iii</sup>                     | 2.009(2)   |
| O2 <sup>ii</sup> -Zn1-O2 <sup>iii</sup>  | 167.70(17) | O2 <sup>ii</sup> -Zn1-N1                  | 96.15(8)   |
| O2 <sup>ii</sup> -Zn1-O1 <sup>i</sup>    | 88.41(11)  | O2 <sup>iii</sup> -Zn1-O1 <sup>i</sup>    | 88.30(11)  |
| N1-Zn1-O1 <sup>i</sup>                   | 105.50(7)  | O1-Zn1-O1 <sup>i</sup>                    | 148.99(14) |

Symmetry codes: **1**, i = x, y, 1+z; ii = 1-x, 0.5+y, -z; **2**, i = -x, y, 0.5-z; **3**, i = 2-x, 1-y, 2-z; ii = x, 0.5-y, 0.5+z; iii = 0.5+x, 0.5-y, 2-z; **4**, i = -1+x, y, z; ii = -0.5+x, -0.5+y, z; iii = 0.5-x, -0.5+y, 1.5-z; iv = -x, y, 1.5-z; v = x, 1-y, 2-z; vi = 0.5+x, -0.5+y, z; vii = 0.5+x, 1.5-y, 2-z; **5**, i = -x, 2-y, -z; ii = 1-x, 2-y, -z; iii = -x, 1-y, -z; iv = x, -1+y, z; v = 1+x, y, z; vi = -x, 2-y, 1-z; vii = 1-x, 2-y, 1-z; viii = 1-x, 3-y, 1-z; **6**, i = x, 1.5-y, 0.5+x; ii = 1-x, 1-y, 1-z; **7**, i = x, 1+y, z; ii = -x, 1-y, 1-z; **8**, i = -x, -y,

2-z; **9**, i = 1+y, -1+x, -z; ii = 2-x, -y, z; iii = 1-y, 1-x, -z.

**Table S2** Hydrogen bond geometries for **2**, **6-8** (Å, °)

| D-H...A                      | <i>d</i> (D-H) | <i>d</i> (H...A) | <i>d</i> (D...A) | ∠D-H...A |
|------------------------------|----------------|------------------|------------------|----------|
| <b>2</b>                     |                |                  |                  |          |
| O4-H4A...O2 <sup>ii</sup>    | 0.82           | 1.84             | 2.658            | 172      |
| C12-H12...O3 <sup>iii</sup>  | 0.93           | 2.45             | 3.338            | 159      |
| C13-H13...O1                 | 0.93           | 2.59             | 3.194            | 123      |
| <b>6</b>                     |                |                  |                  |          |
| O1W-H11...O2 <sup>iii</sup>  | 0.83           | 1.96             | 2.751            | 160      |
| O1W-H12...O4 <sup>iv</sup>   | 0.83           | 1.91             | 2.706            | 159      |
| C10-H10...O5 <sup>v</sup>    | 0.93           | 2.43             | 3.286            | 153      |
| <b>7</b>                     |                |                  |                  |          |
| O1W-H1W...O3 <sup>iii</sup>  | 0.82           | 1.94             | 2.737            | 164      |
| O1W-H2W...O2W <sup>iii</sup> | 0.82           | 1.89             | 2.702            | 169      |
| O2W-H3W...N3                 | 0.82           | 2.34             | 3.111            | 155      |
| O2W-H4W...O2                 | 0.82           | 1.91             | 2.732            | 175      |
| C13-H13...O2                 | 0.93           | 2.55             | 3.151            | 123      |
| <b>8</b>                     |                |                  |                  |          |
| O1W-H1W...O4 <sup>ii</sup>   | 0.87           | 1.85             | 2.682            | 161      |
| O1W-H2W...O1 <sup>iii</sup>  | 0.87           | 1.91             | 2.761            | 167      |
| C14-H14...O2 <sup>iv</sup>   | 0.93           | 2.26             | 3.035            | 141      |
| C15-H15A...O3 <sup>i</sup>   | 0.96           | 2.47             | 3.207            | 134      |

Symmetry codes: **2**, ii = 0.5-x, 0.5+y, 0.5-z; iii = -0.5+x, 1.5-y, -0.5+z; **6**, iii = x, y, 1+z; iv = 1-x, 0.5+y, 1.5-z; v = -x, 0.5+y, 1.5-z; **7**, iii = 1-x, 1-y, 1-z; **8**, i = -x, -y, 2-z; ii = -1+x, 1+y, z; iii = -1+x, y, z; iv = -x, 1-y, 2-z.
